# Supplementary material for: Structural basis for synthase activation and cellulose modification in the E. coli Type II Bcs secretion system
Source: Research Square preprint supplement (doi:10.21203/rs.3.rs-4560365/v1), 2024-06-19
Supplement: Supplementary file 1 [file 7940bd275c11bb2666449604.docx]

PDB files, cryo-EM maps and validation reports are available for peer review in the following Dropbox folder for download:

<https://www.dropbox.com/scl/fo/u86u6rkhnmekgacl2iqmn/AEukgJlb75hI6hANi1Hgm-s?rlkey=4v4g94o6m3yr0n46fkump41vl&st=zg950s75&dl=0>

***Please note that you do not need to log in to download the files.***

Please contact the editorial office (naturecommunications@nature.com) if you have any problems downloading the files.
